# Supplementary material
Source: publisher figshare collection journal article supplement (https://tandf.figshare.com/articles/dataset/_/1568855)

## Casual Cyclists

These maps illustrate the cycle routes collected through the initiative Huella Ciclista de Madrid (Madrid Cycle Track). The initiative was launched through an online platform (website available at [www.huellaciclistademadrid.es](http://www.huellaciclistademadrid.es)). In this platform, different online maps represented the evolution the collective track over time. The Casual Cyclist map is represented here as embedded in the existing online platform. The pop up window represents the information obtained for each track.

The total number of cycle routes gathered was 6,022 resulting in 48,122 km of GPS tracks uploaded by 328 volunteers participating from June 2013 to September 2014, taking into account both the casual cyclists and bike messengers. Casual cyclists' routes were mainly collected from June 2013 to March 2014.

Table 1. Route statistics according to the purpose of the journey | (\* Routes with known purpose)

| Purpose of the journey | Routes (%) | Routes* (%) | Speed Average (Km/h) | Time Average (minutes) | Distance Average (metres) |
|------------------------|------------|-------------|----------------------|------------------------|---------------------------|
| Commuting              | 31.11      | 42.19       | 15.82                | 24.52                  | 5,889                     |
| Leisure                | 17.17      | 23.28       | 15.15                | 23.94                  | 5,705                     |
| Sport                  | 5.72       | 7.76        | 16.19                | 80.81                  | 21,002                    |
| Shopping               | 6.30       | 8.55        | 14.66                | 22.29                  | 5,648                     |
| Management / other     | 5.51       | 7.47        | 15.18                | 17.07                  | 4,231                     |
| Study                  | 7.93       | 10.76       | 14.82                | 21.12                  | 5,201                     |
| Unknown                | 26.26      | -           | 14.28                | 28.30                  | 6,638                     |
| Total / Average        | 100.00     | 100.00      | 15.42                | 31.64                  | 7,947                     |

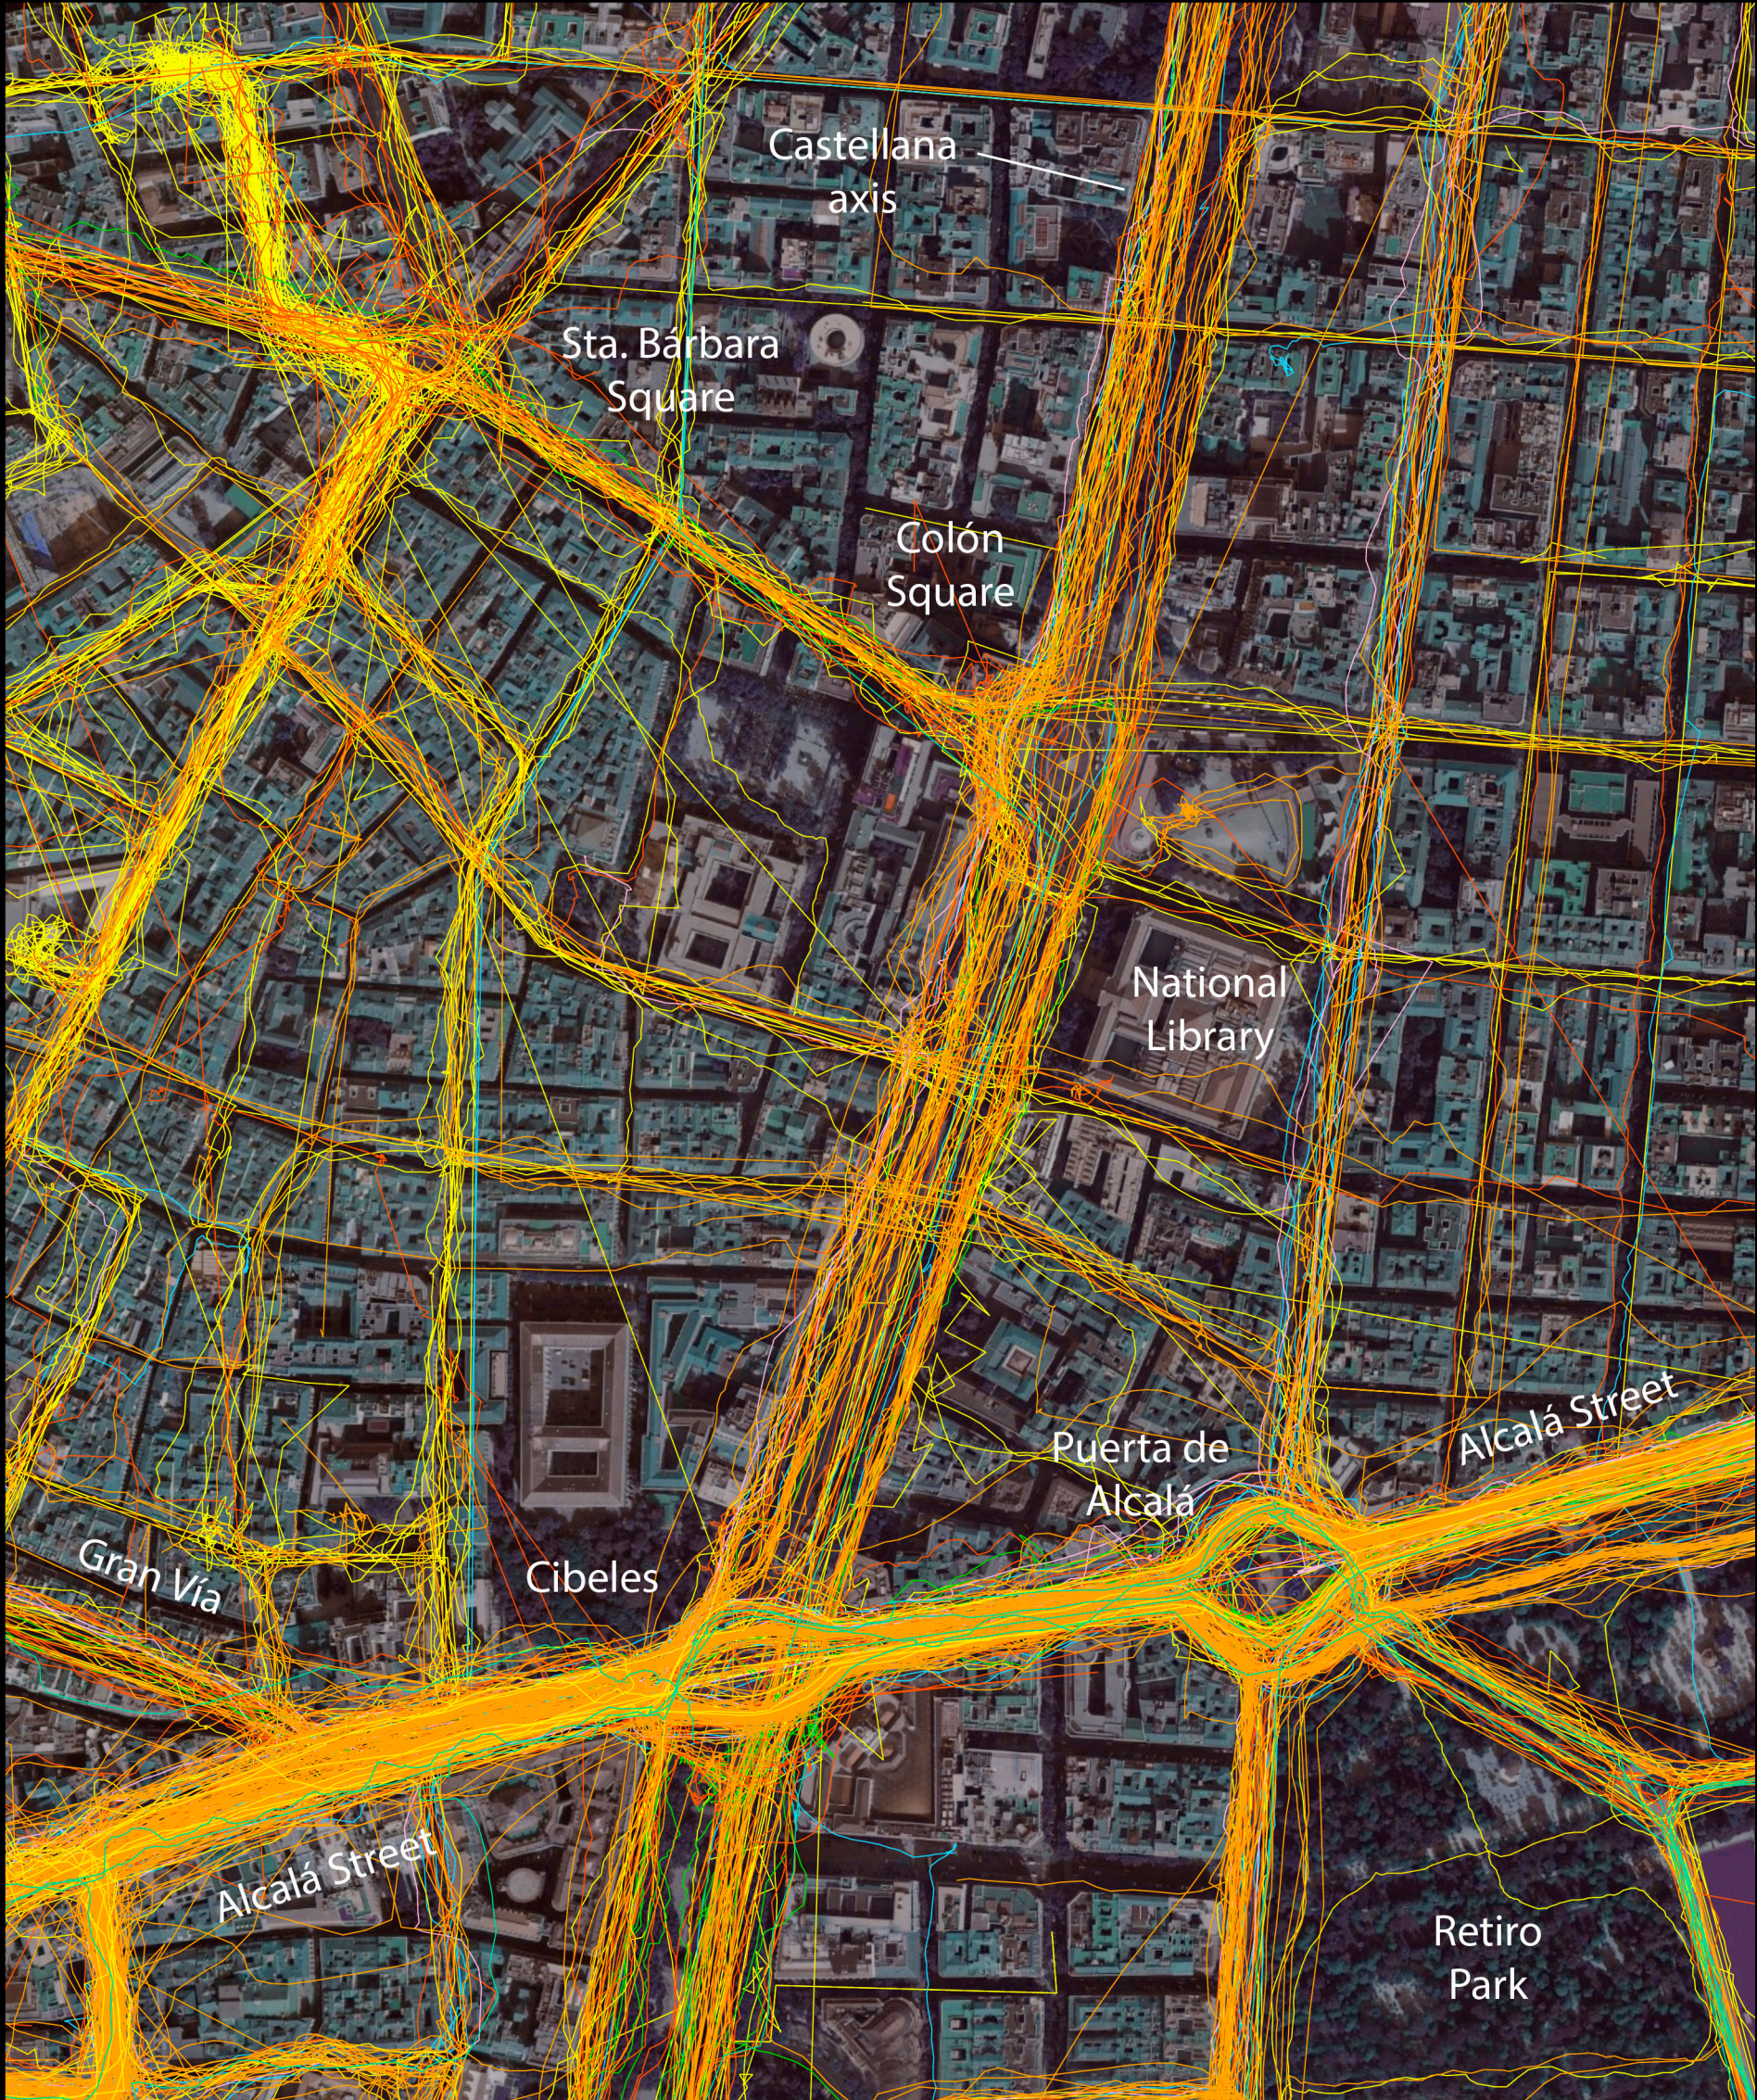

**Coordinate System & Projection**  
WGS 1984 Complex UTM Zone 30 N  
Projection: Transverse Mercator Complex  
False Easting: 500000.0 | False Northing: 0.0  
Central Meridian: -3.0  
Latitude of origin: 0.0 | Linear Unit: Meter (1.0)

**Scale**  
1:5,000  
0 100 200 500 m

**North**  


MadridCycleTrack

Do you cycle? Leave your track

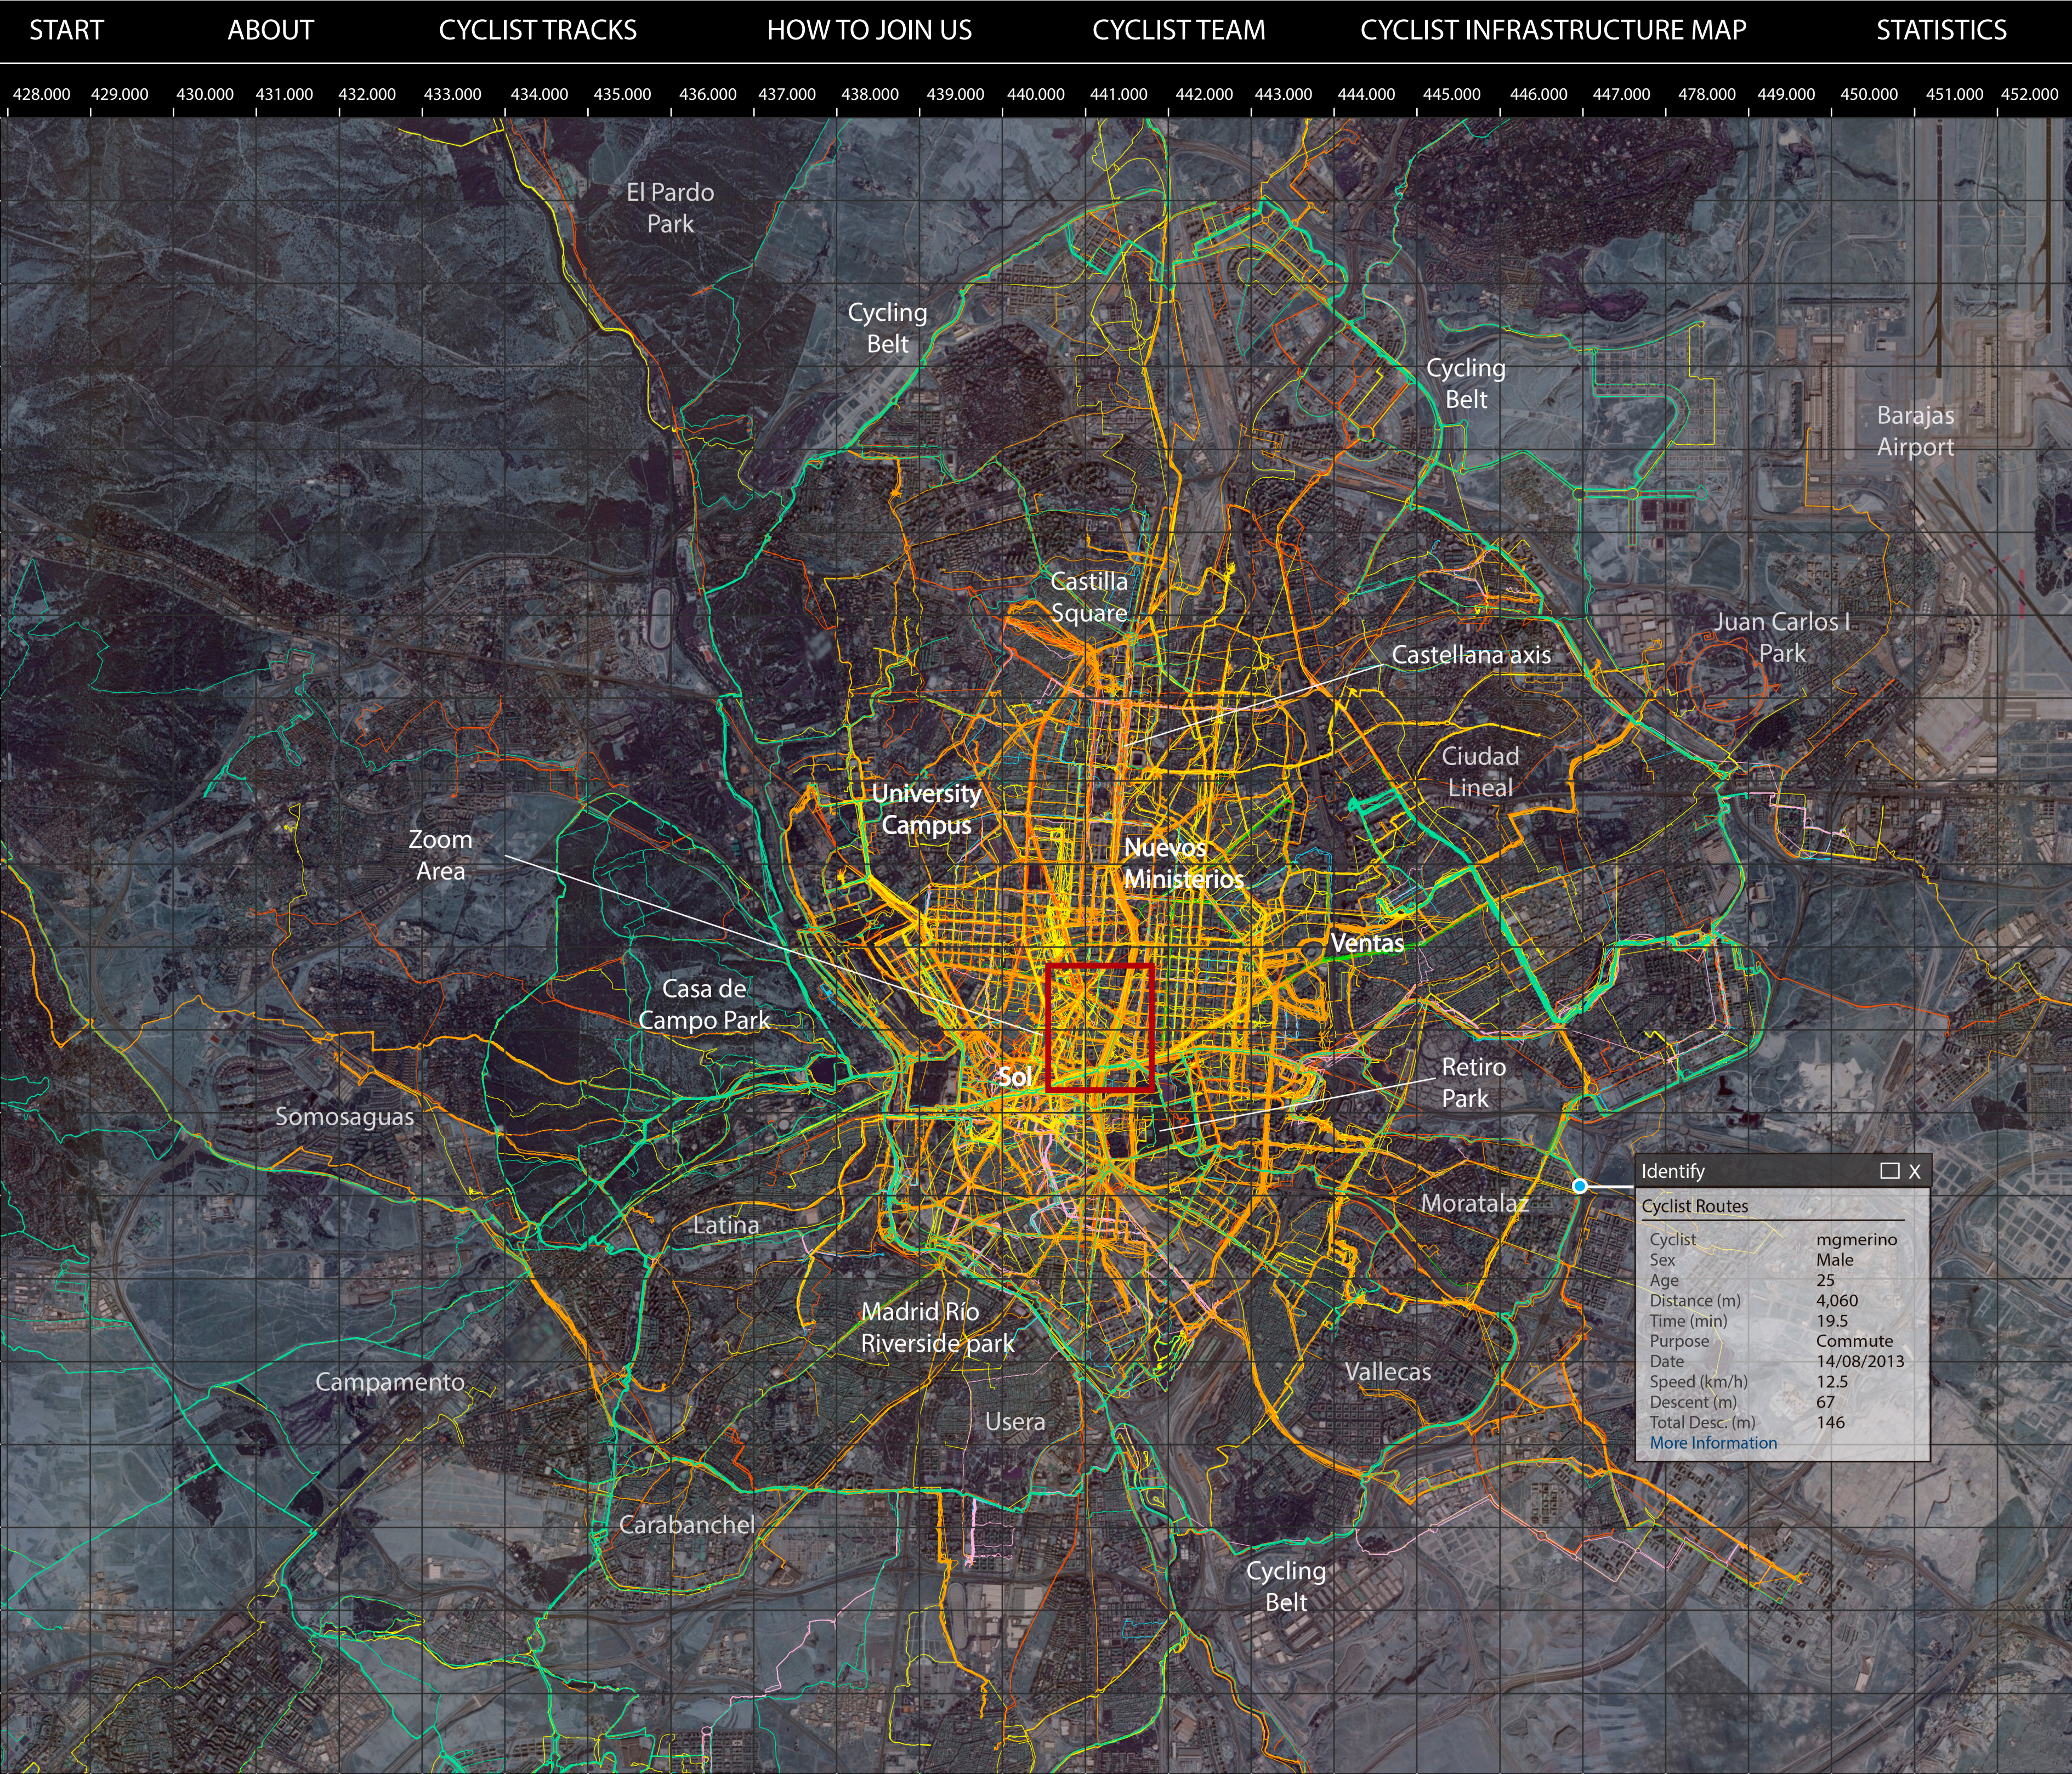

**Purpose of the journey**  
Commutate / work Others  
Sport Studies  
Shopping Leisure

**Coordinate System & Projection**  
WGS 1984 Complex UTM Zone 30 N  
Projection: Transverse Mercator Complex  
False Easting: 500000.0 | False Northing: 0.0  
Central Meridian: -3.0  
Latitude of origin: 0.0 | Linear Unit: Meter (1.0)

**Data Sources**  
+ Base Map: Ortophoto Madrid | Source: Esri - Goeye  
Real colours are filtered  
+ Cycle routes: Data collected by the Huella ciclista de Madrid Initiative ([www.huellaciclistademadrid.es](http://www.huellaciclistademadrid.es))

**Scale**  
1:50,000  
0 1 2 5 km

**North**  


## Bike messengers

The bike messengers' routes were collected from November 2013 to September 2014. A total number of 2,052 routes were finally gathered from four different companies, providing 10,777 cycled kilometres.

Table 2. Route statistics according to the type of bike of the messengers

| Type of bike         | Routes (uds.) | Speed Av. (km/h) | Distance Av. (m) |
|----------------------|---------------|------------------|------------------|
| Normal Bike          | 1,553         | 19.6             | 5,245            |
| Bullit bike (elect.) | 131           | 19.7             | 3,061            |
| Cargo trike (elect.) | 37            | 11.4             | 2,494            |

Table 3. Routes by company

| Company   | Routes (uds.) |
|-----------|---------------|
| Bike Post | 400           |
| Trebol    | 852           |
| Emakers   | 389           |
| Mensos    | 411           |

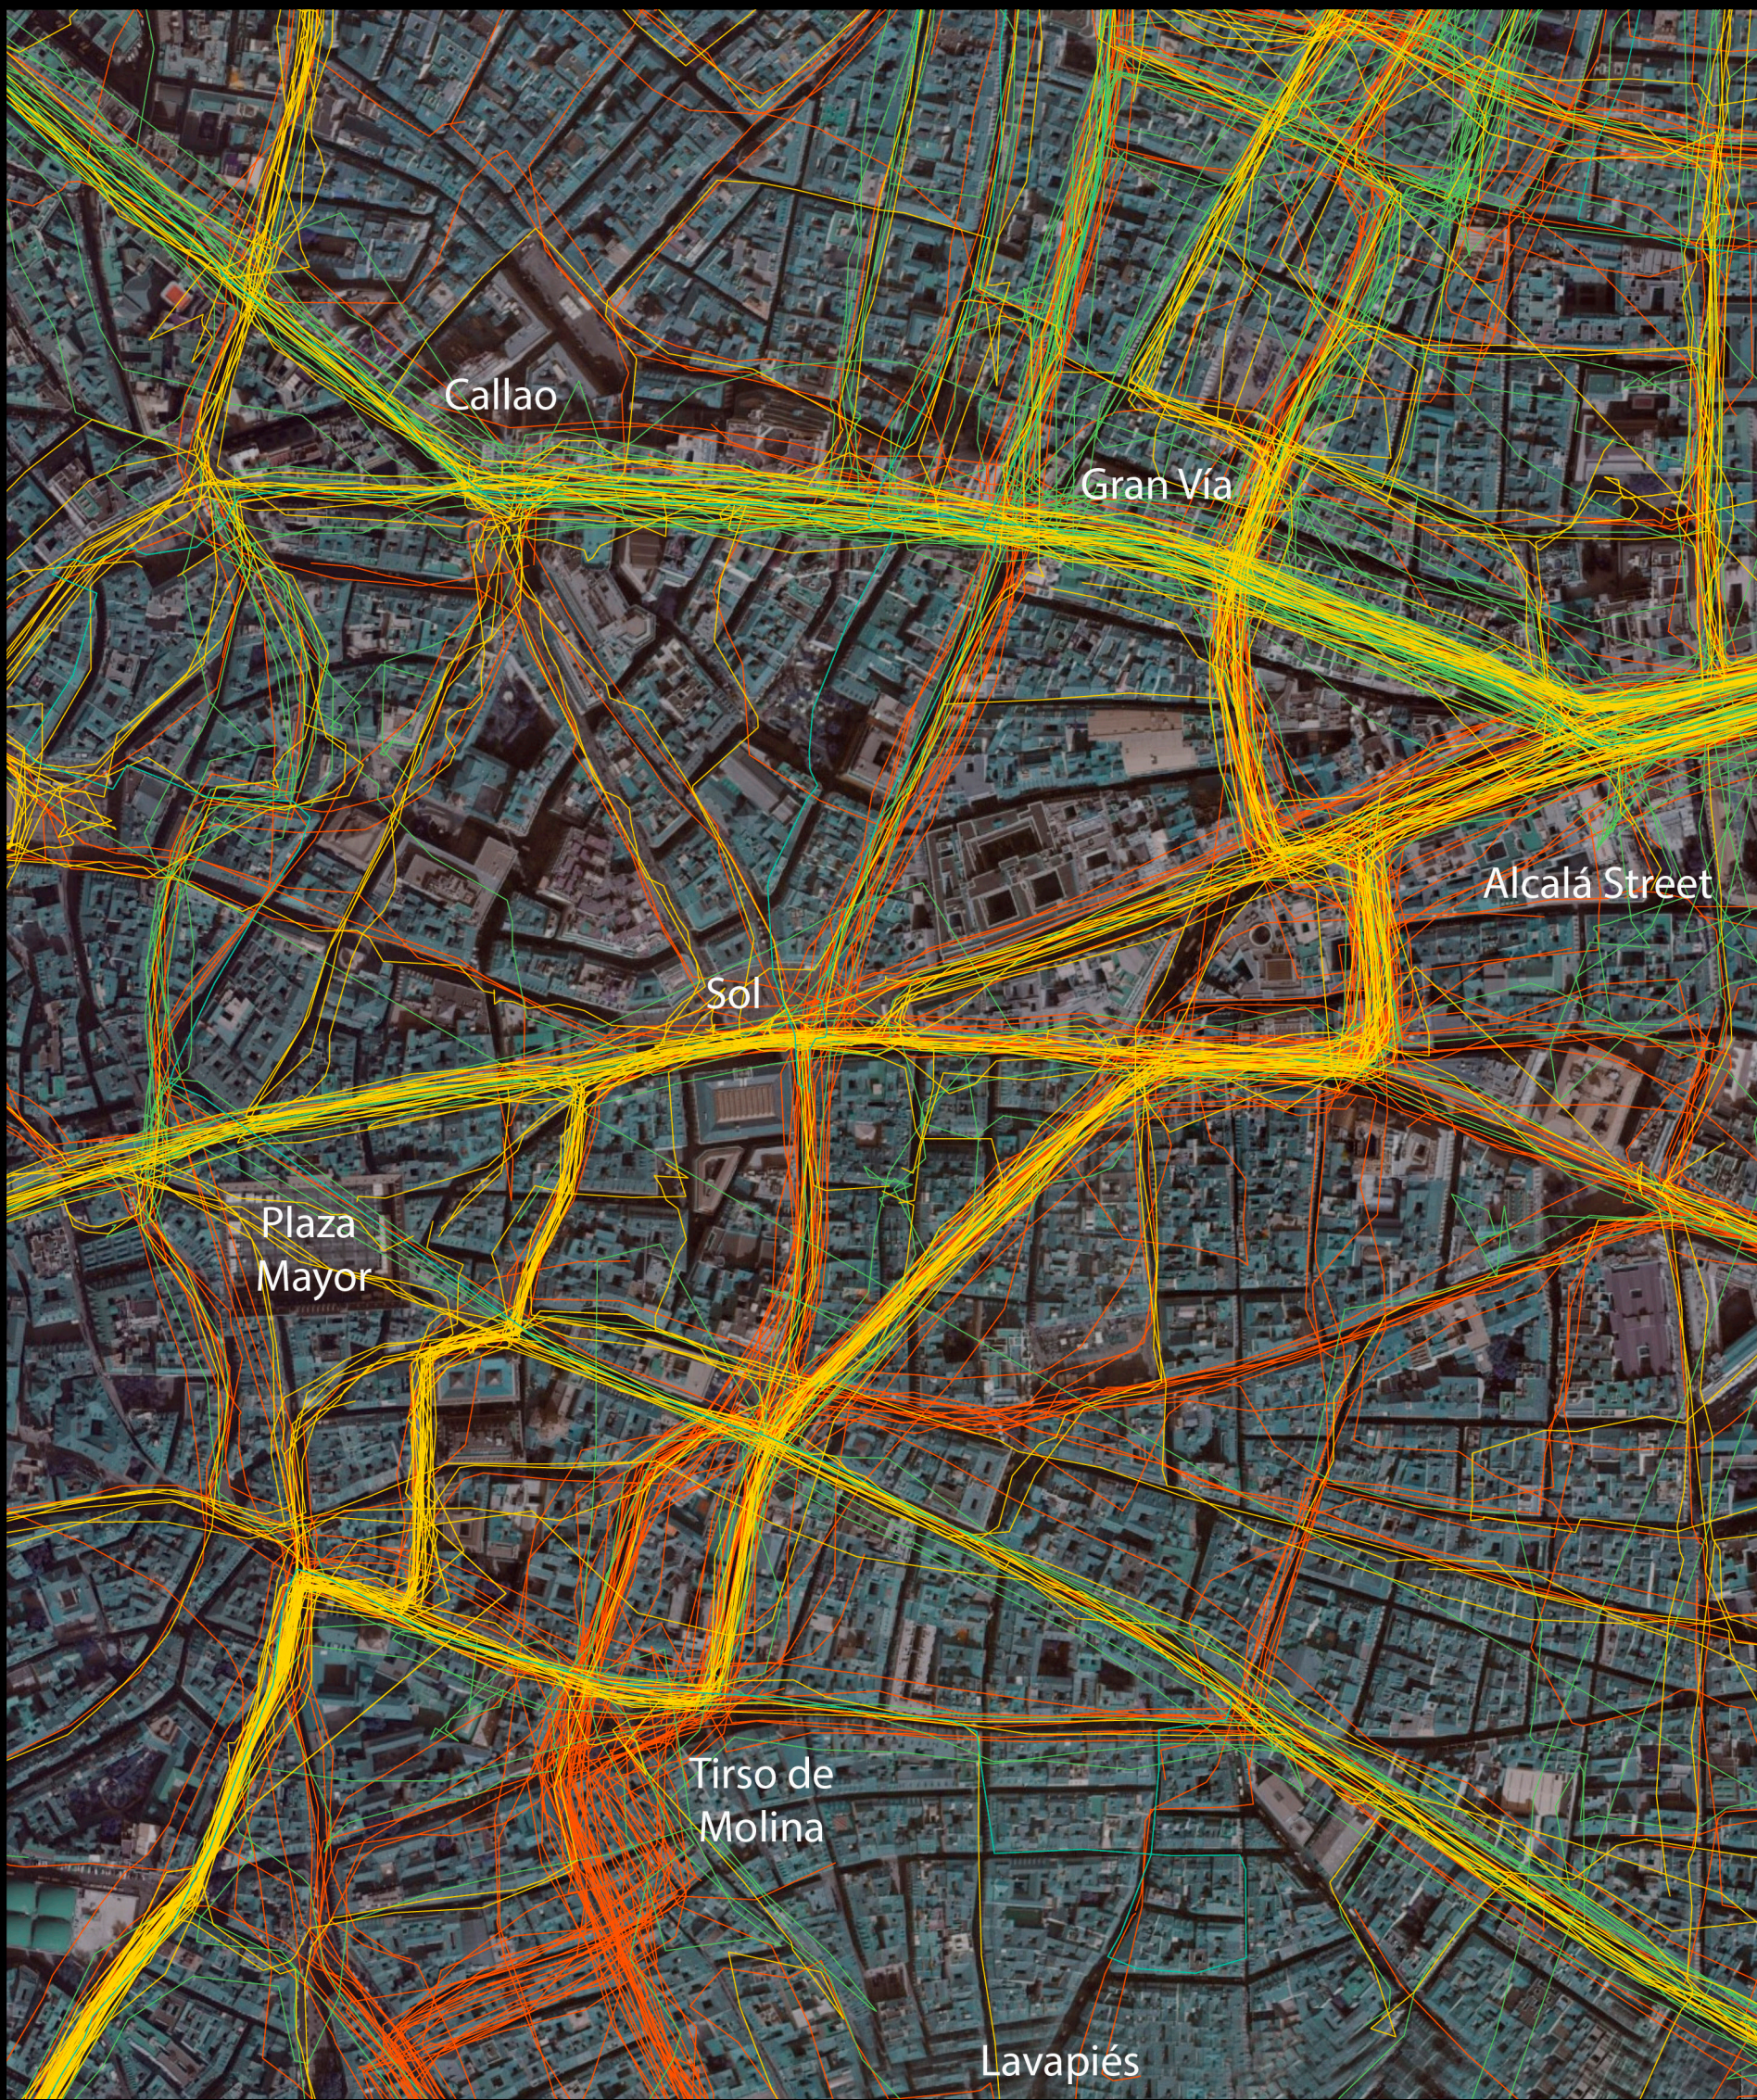

**Coordinate System & Projection**  
WGS 1984 Complex UTM Zone 30 N  
Projection: Transverse Mercator Complex  
False Easting: 500000.0 | False Northing: 0.0  
Central Meridian: -3.0  
Latitude of origin: 0.0 | Linear Unit: Meter (1.0)

**Scale**  
1:5,000  
0 100 200 500 m

**North**  


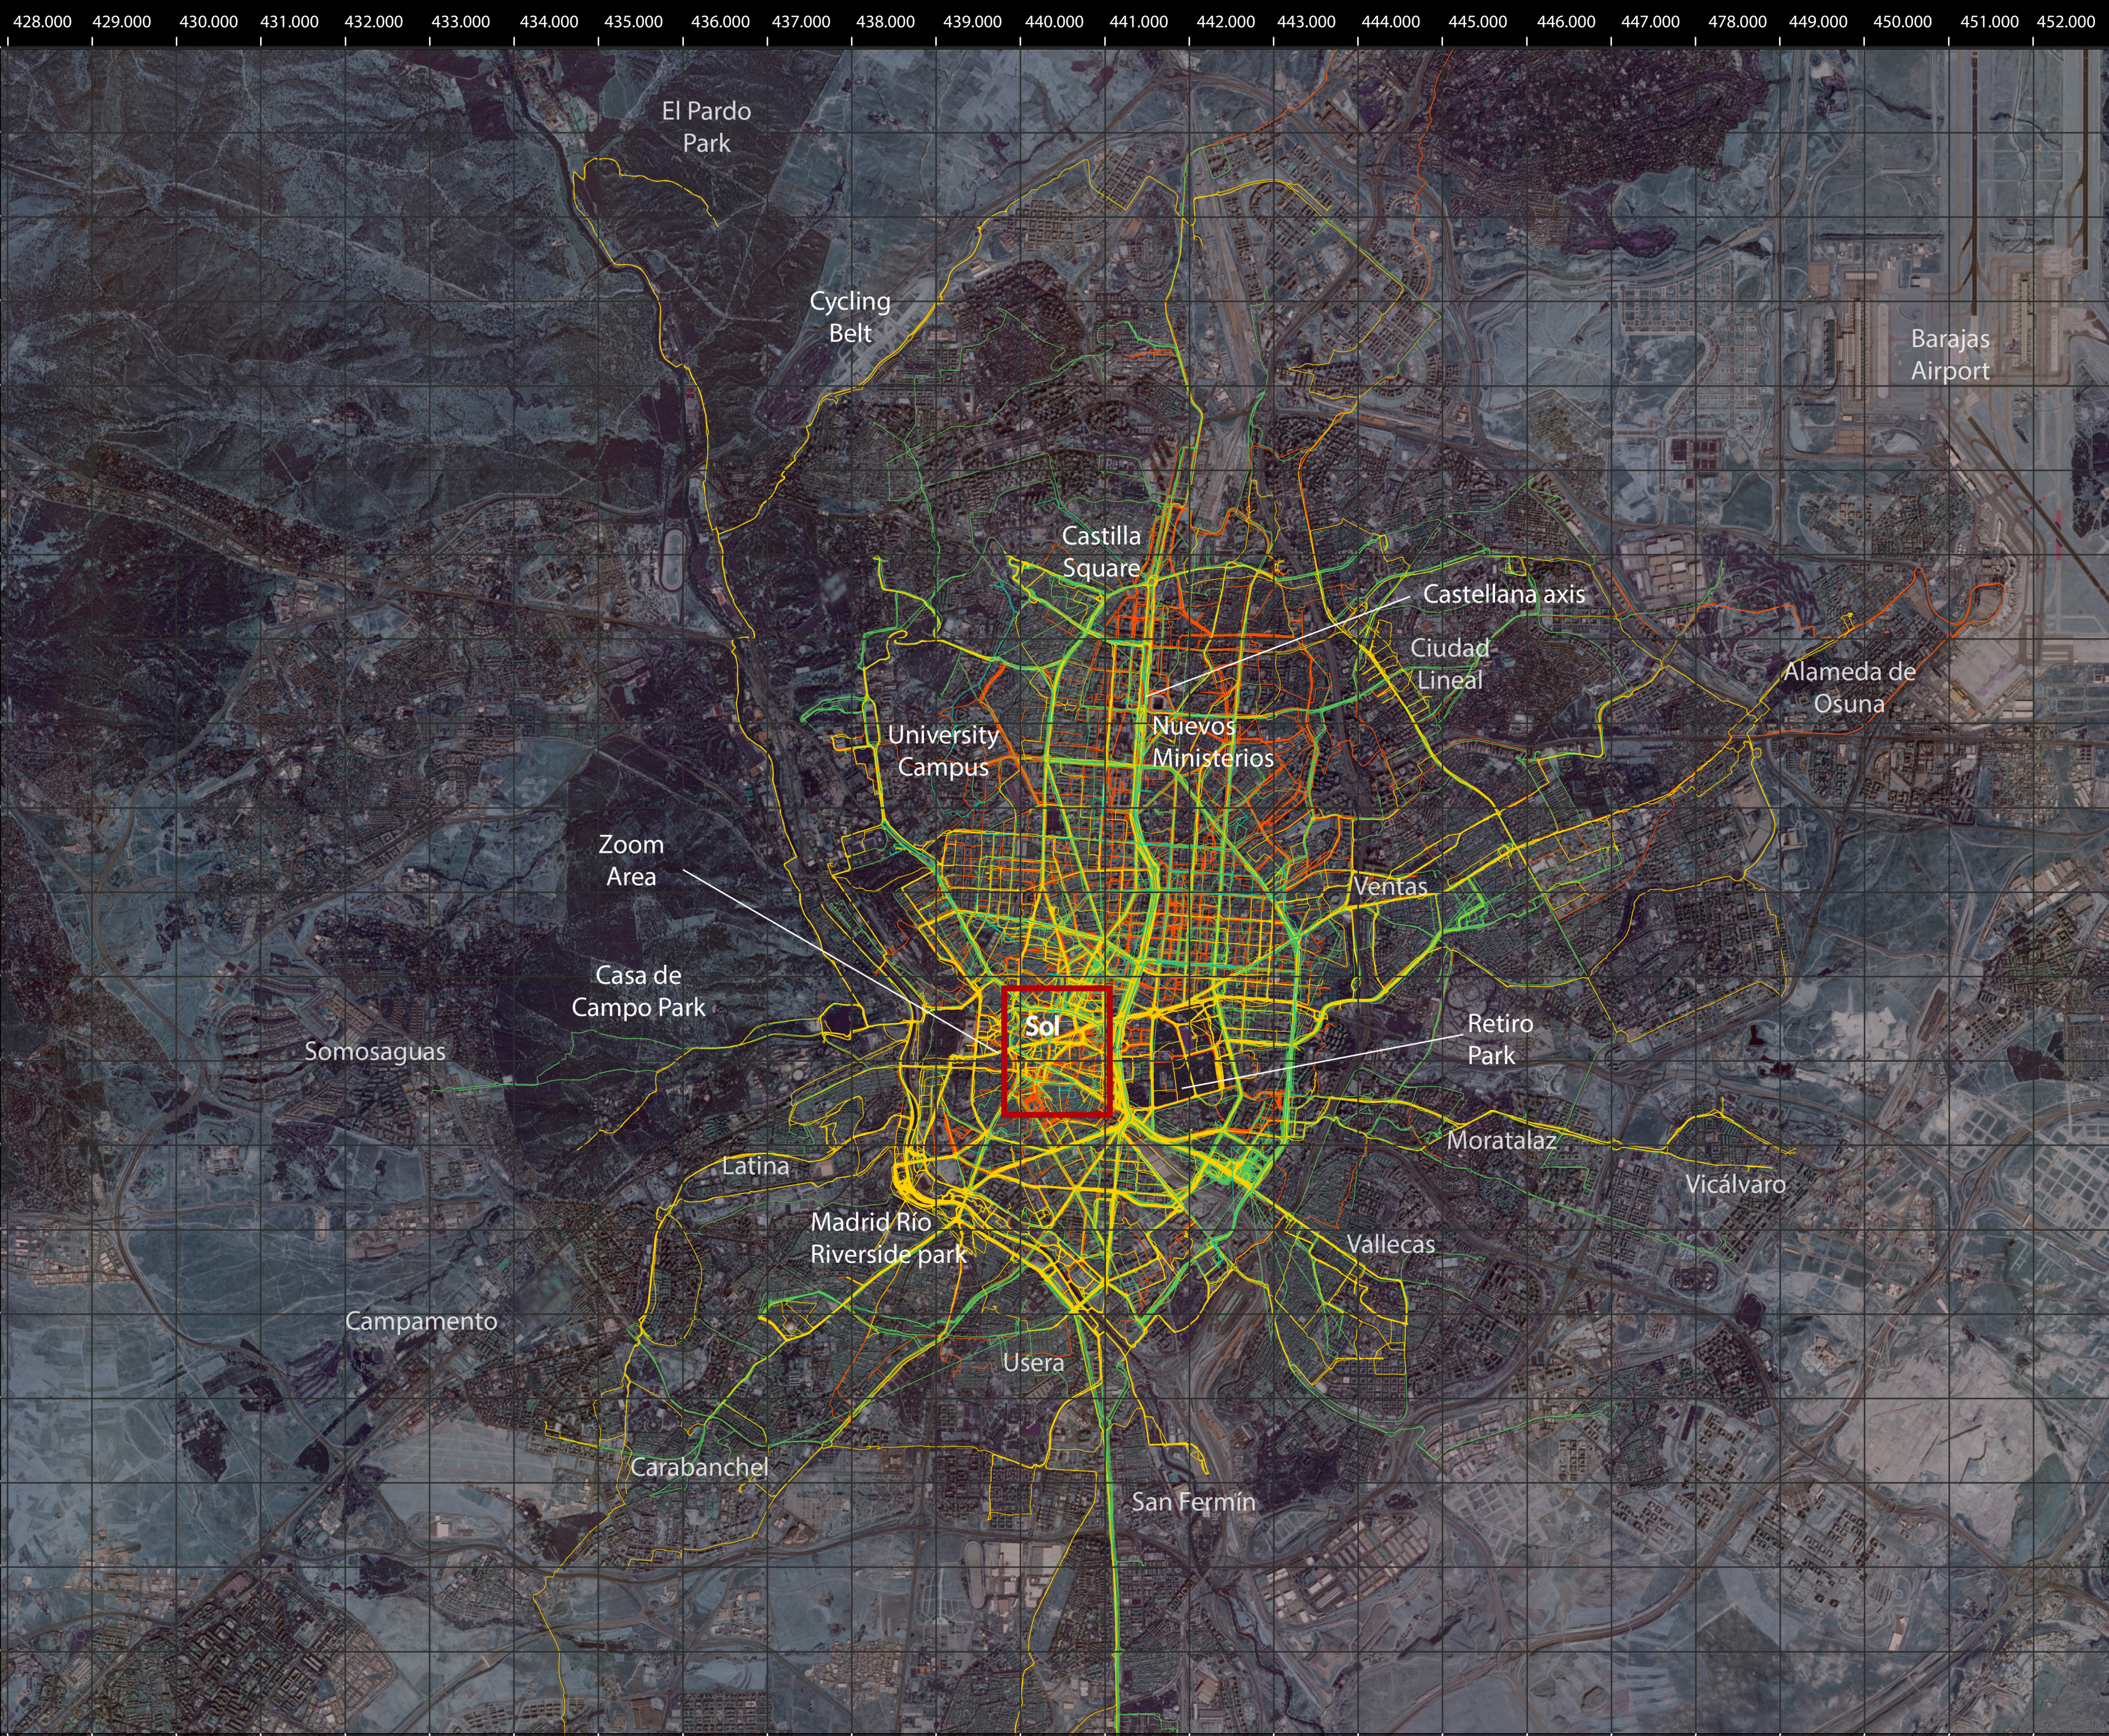

**Bike messengers companies**  
Bike Post ecomensajeros  
Trebol ecomensajeros  
Emakers  
Mensos

**Coordinate System & Projection**  
WGS 1984 Complex UTM Zone 30 N  
Projection: Transverse Mercator Complex  
False Easting: 500000.0 | False Northing: 0.0  
Central Meridian: -3.0  
Latitude of origin: 0.0 | Linear Unit: Meter (1.0)

**Data Sources**  
+ Base Map: Ortophoto Madrid | Source: Esri - Goeye  
Real colours are filtered  
+ Cycle routes: Data collected by the Huella ciclista de Madrid Initiative ([www.huellaciclistademadrid.es](http://www.huellaciclistademadrid.es))

**Scale**  
1:50,000  
0 1 2 5 km

**North**  


Supplement: Supplementary file 1 [file 1]
